# Supplementary material for: Interfacial charge transfer-driven UV-activated photocatalytic degradation of metronidazole via δ-MnO2/WO3 heterojunction in aqueous media
Source: Royal Society of Chemistry journal article supplement (doi:10.1039/d6ra00866f), 2026-03-27
Supplement: d6ra00866f1.pdf [file d6ra00866f1.pdf]

# Supplementary Information

## Interfacial charge transfer–driven UV-activated photocatalytic degradation of metronidazole via $\delta$ -MnO<sub>2</sub>/WO<sub>3</sub> heterojunction in aqueous media

Md Shafayatul Islam<sup>1</sup>, Mehedi Hasan Prince<sup>2</sup>, Koushik Roy Chowdhury<sup>1</sup>, Sifat Sharmin Rawfa<sup>3</sup>,  
Ilma Jahan Ritu<sup>4</sup>, S M Khalid Hossain<sup>1</sup>, and Ahmed Sharif<sup>1\*</sup>

<sup>1</sup>Department of Materials and Metallurgical Engineering, Bangladesh University of Engineering and Technology, Dhaka 1000

<sup>2</sup>Department of Materials Science & Engineering, Rensselaer Polytechnic Institute (RPI), NY, 12180, USA

<sup>3</sup>Department of Mathematics, University of Dhaka, Dhaka - 1000, Bangladesh

<sup>4</sup>Magura Medical College, Magura, 7600, Bangladesh

\*Email: [asharif@mme.buet.ac.bd](mailto:asharif@mme.buet.ac.bd)

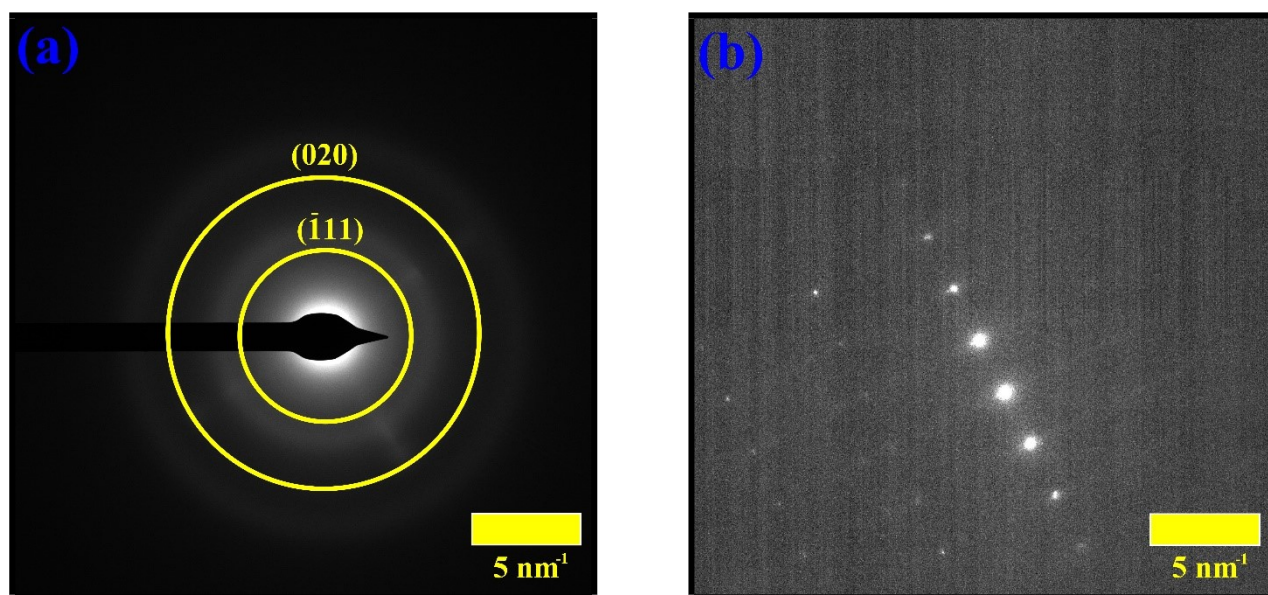

Figure S1: Selected area electron diffraction (SAED) patterns of (a) pristine  $\delta$ -MnO<sub>2</sub> and (b) pure WO<sub>3</sub>. The concentric diffraction rings observed for  $\delta$ -MnO<sub>2</sub> correspond to the (111) and (020) crystallographic planes, indicating its polycrystalline nature. In contrast, the discrete diffraction spots in the SAED pattern of WO<sub>3</sub> suggest a higher degree of crystallinity with well-defined lattice ordering.

### Calculations for $E_{CBM}$ and $E_{VBM}$ :

The electronegativity of the  $MnO_2$  and  $WO_3$  NPs is calculated from the equation (3) is,

$\chi_{MnO_2} = \sqrt[3]{(3.232)_{Mn}^1(7.5395)_O^2} = 5.68$ , so, the conduction band minimum value ( $E_{CBM}$ ) and the maximum valence band value ( $E_{VBM}$ ) of  $MnO_2$  is calculated as 0.65 eV and 1.71 eV from equations (1) and (2).  $\chi_{WO_3} = \sqrt[4]{(4.399)_W^1(7.5395)_O^3} = 6.58$  Conduction band minimum value ( $E_{CBM}$ ) and the maximum valence band value ( $E_{VBM}$ ) of  $WO_3$  is calculated as 0.62 and 3.55.

## Effect of pH (pure $\text{MnO}_2$ ):

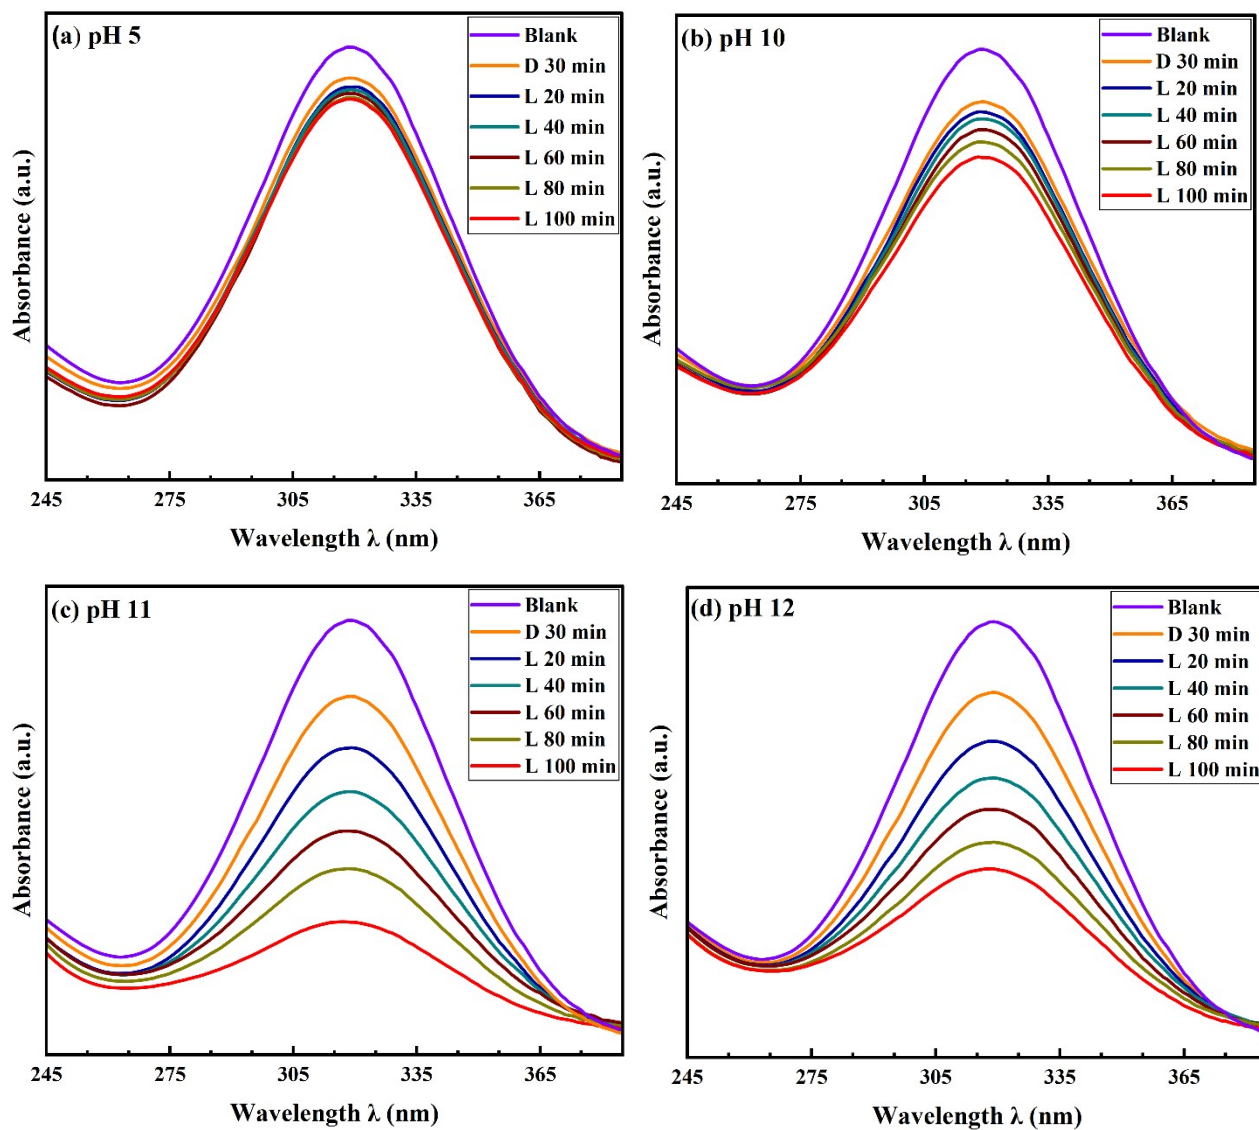

Figure S2: UV-Vis absorption spectra of MNZ degradation using  $\text{MnO}_2$  as a catalyst at different pH values under UV irradiation: (a) pH 5, (b) pH 10, (c) pH 11, and (d) pH 12. The  $\text{MnO}_2$  dosage was fixed at 0.5 g/L, and the initial MNZ concentration was 10 ppm.

### Particle Variation (Pure $\text{MnO}_2$ ):

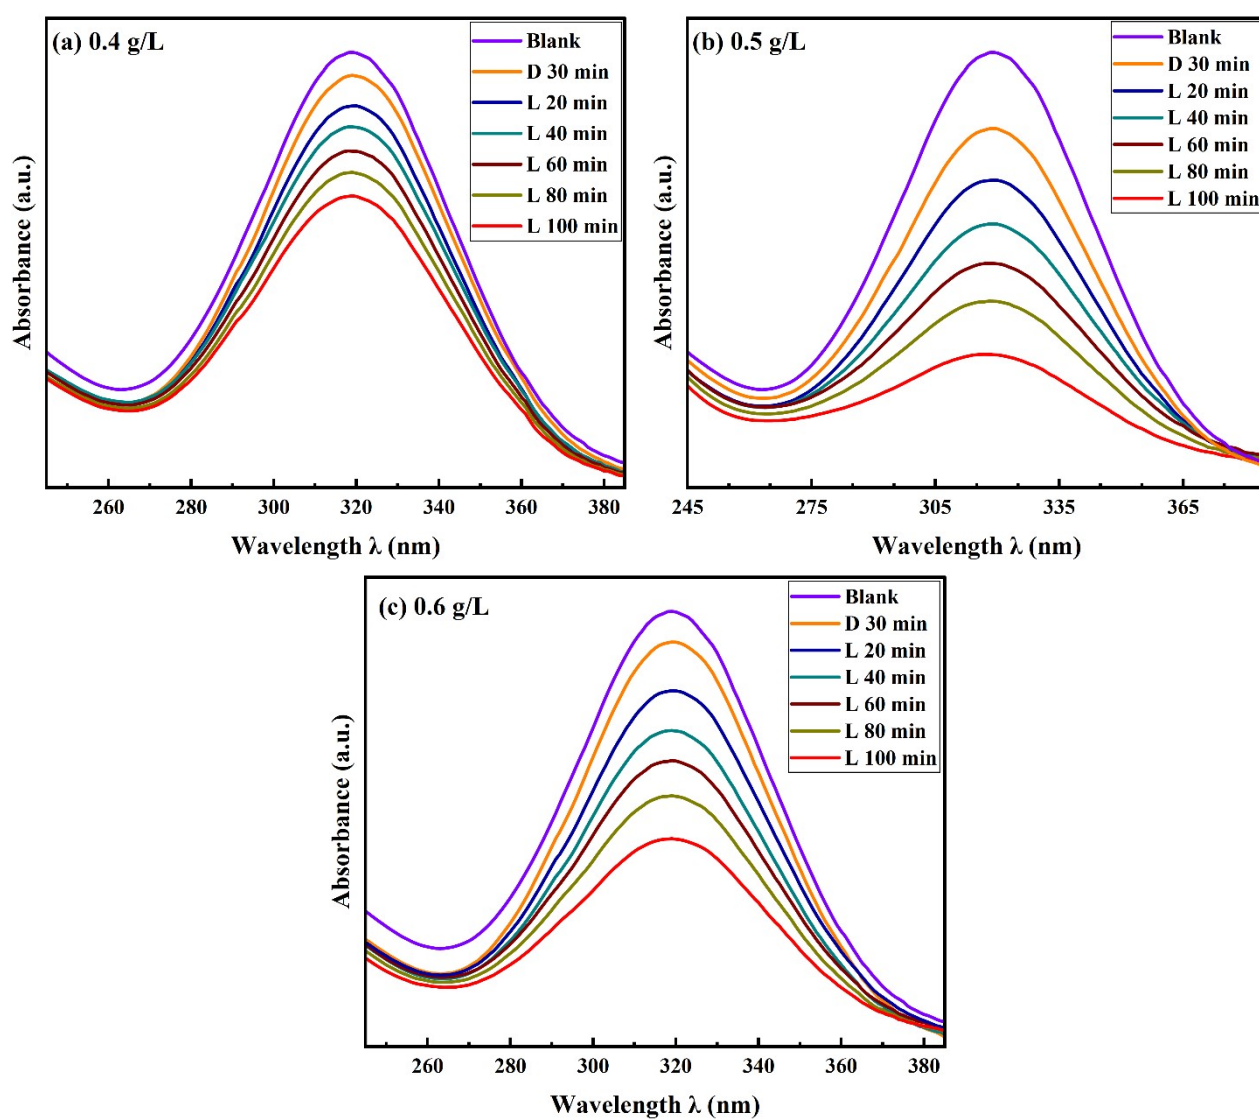

Figure S3: UV-Vis absorption spectra illustrating the photocatalytic degradation of MNZ over  $\text{MnO}_2$  at different catalyst dosages: 0.4, 0.5, and 0.6 g/L, under UV irradiation. The initial MNZ concentration was fixed at 10 ppm, and the solution pH was maintained at 11.

**Effect of pH (pure  $\text{WO}_3$ ):**

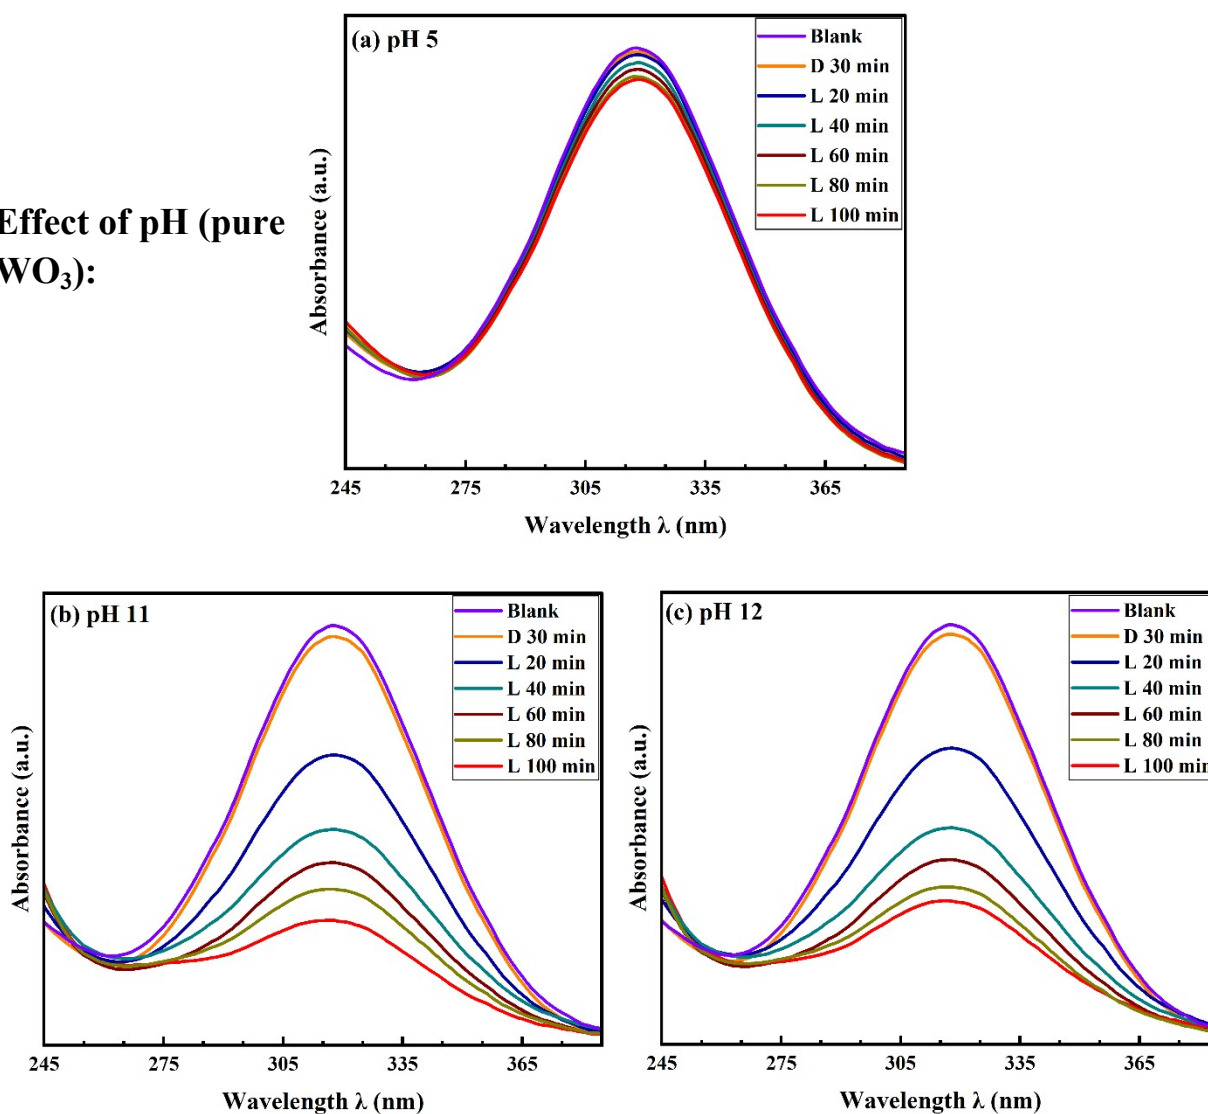

Figure S4: UV-Vis absorption spectra illustrating the photocatalytic degradation of MNZ over pure  $\text{WO}_3$  at different pH values under UV irradiation: (a) pH 5, (b) pH 11, and (c) pH 12. The initial MNZ concentration was fixed at 10 ppm.

## Composite:

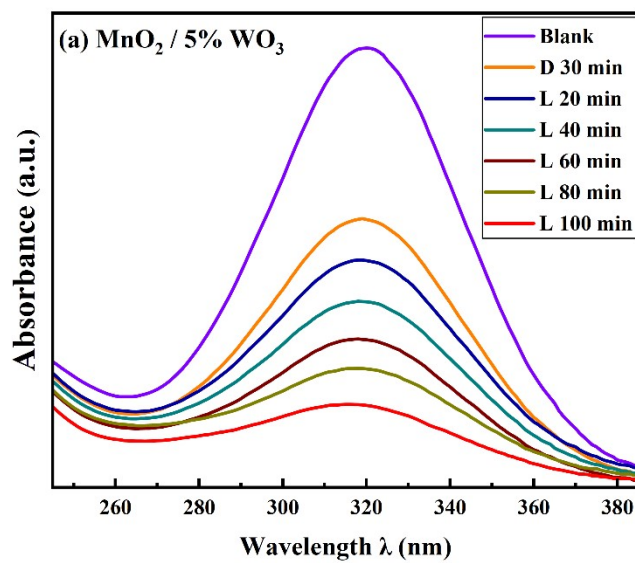

Figure S5: UV-Vis absorption spectra showing the photocatalytic degradation of MNZ over  $\text{MnO}_2\text{-WO}_3$  composite photocatalysts of  $\delta\text{-MnO}_2/5\% \text{WO}_3$ , under UV irradiation. The initial MNZ concentration was fixed at 10 ppm.

**Table S1: Pseudo First-order Fitting parameters.**

| pH | R <sup>2</sup> value |                  |
|----|----------------------|------------------|
|    | WO <sub>3</sub>      | MnO <sub>2</sub> |
| 5  | 0.9859               | 0.5812           |
| 10 | --                   | 0.83443          |
| 11 | 0.92183              | 0.97303          |
| 12 | 0.96205              | 0.95361          |

| MnO <sub>2</sub> particle Variation (g/L) | R <sup>2</sup> value |
|-------------------------------------------|----------------------|
| 0.4                                       | 0.97303              |
| 0.5                                       | 0.98487              |
| 0.6                                       | 0.97814              |

| Species                                | R <sup>2</sup> value |
|----------------------------------------|----------------------|
| MnO <sub>2</sub>                       | 0.97303              |
| WO <sub>3</sub>                        | 0.93014              |
| MnO <sub>2</sub> /WO <sub>3</sub> (5%) | 0.96977              |

### Reusability of the photocatalyst:

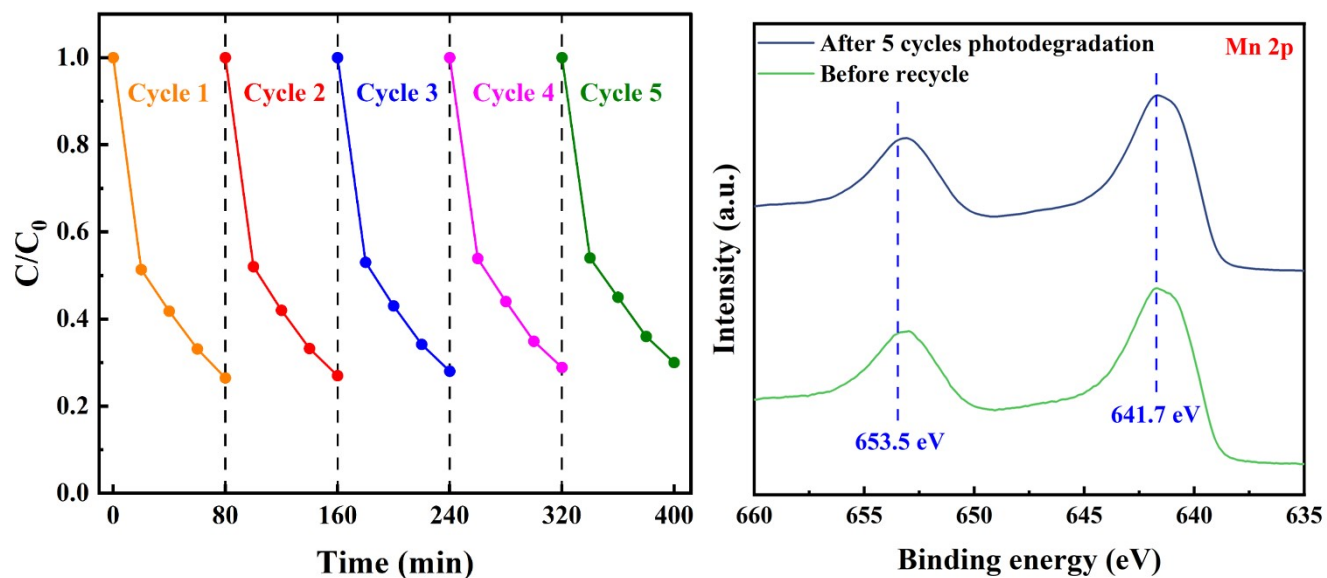

Figure S6: Recyclability and post-reaction stability analysis of the  $\delta$ -MnO<sub>2</sub>/WO<sub>3</sub> (5%) heterojunction. (a) Degradation efficiency over five successive photocatalytic cycles (80 min each). (b) Mn 2p XPS spectra before and after five cycles, showing negligible variation in binding energies, which confirms the structural and chemical robustness of the photocatalyst during repeated operation.
